## Review

# Mechanical stress-induced cardiac hypertrophy: mechanisms and signal transduction pathways

Cindy Ruwhof, Arnoud van der Laarse\*

Department of Cardiology, Leiden University Medical Center, P.O. Box 9600, 2300 RC Leiden, The Netherlands

Received 19 January 2000; accepted 22 March 2000

---

**Abstract**

Cardiac hypertrophy is a well known response to increased hemodynamic load. Mechanical stress is considered to be the trigger inducing a growth response in the overloaded myocardium. Furthermore, mechanical stress induces the release of growth-promoting factors, such as angiotensin II, endothelin-1, and transforming growth factor- $\beta$ , which provide a second line of growth induction. In this review, we will focus on the primary effects of mechanical stress: how mechanical stress may be sensed, and which signal transduction pathways may couple mechanical stress to modulation of gene expression, and to increased protein synthesis. Mechanical stress may be coupled to intracellular signals that are responsible for the hypertrophic response via integrins and the cytoskeleton or via sarcolemmal proteins, such as phospholipases, ion channels and ion exchangers. The signal transduction pathways that may be involved belong to two groups: (1) the mitogen-activated protein kinases (MAPK) pathway; and (2) the janus kinase/signal transducers and activators of transcription (JAK/STAT) pathway. The MAPK pathway can be subdivided into the extracellular-regulated kinase (ERK), the c-Jun N-terminal kinase (JNK), and the 38-kDa MAPK (p38 MAPK) pathway. Alternatively, the stress signal may be directly submitted to the nucleus via the cytoskeleton without the involvement of signal transduction pathways. Finally, by promoting an increase in intracellular  $\text{Ca}^{2+}$  concentration stretch may stimulate the calcium/calmodulin-dependent phosphatase calcineurin, a novel hypertrophic signalling pathway. © 2000 Elsevier Science B.V. All rights reserved.

**Keywords:** Hypertrophy; Myocytes; Protein kinases; Signal transduction; Stretch/m-e coupling

---

**1. Introduction**

Cardiac hypertrophy is a fundamental process of adapta-

tion to an increased workload due to hemodynamic overload [1,2]. Development of cardiac hypertrophy is initially beneficial since it augments the number of contractile units and reduces ventricular wall stress to normal levels according to the law of Laplace. However, the adaptation has its limits and heart failure may ensue. Furthermore, arrhythmias and ischaemic heart disease may develop which increase the risk of sudden death.

During development of cardiac hypertrophy specific changes have been observed in cardiomyocytes, (1) rapid induction of proto-oncogenes and heat shock protein genes ('immediate-early' genes); (2) quantitative and qualitative changes in gene expression; and (3) increased rate of protein synthesis.

The first response to hemodynamic overload is the induction of proto-oncogenes (such as *c-fos*, *c-jun*, and *c-myc*) and heat shock protein genes (such as *hsp70*),

---

**Abbreviations:** Ang II, angiotensin II; ANP, atrial natriuretic peptide;  $[\text{Ca}^{2+}]_i$ , intracellular calcium concentration; DAG, diacylglycerol; ECM, extracellular matrix; ERK, extracellular-regulated kinase; ET-1, endothelin-1; FAC, focal adhesion complex; FAK, focal adhesion kinase; G protein, guanine nucleotide-binding protein; IE genes, immediate-early genes; JAK, Janus-associated kinase; JNKc, Jun N-terminal protein kinase; MAPK, mitogen-activated protein kinase; MEK, MAPK/ERK kinase; MHC, myosin heavy chain; NHE,  $\text{Na}^+/\text{H}^+$  exchanger; PKC, protein kinase C; PLC, phospholipase C; PLD, phospholipase D; p38 MAPK, 38 kDa mitogen-activated protein kinase;  $\text{p70}^{\text{S6K}}$ , 70 kDa S6 kinase;  $\text{p90}^{\text{RSK}}$ , 90 kDa ribosomal S6 kinase (=MAPKAPK1); SAC, stretch-activated channel; SAPK, stress-activated protein kinase; STAT, signal transducers and activators of transcription; TGF- $\beta$ , transforming growth factor-beta

\*Corresponding author. Tel.: +31-71-526-3704; fax: +31-71-526-6809.

E-mail address: a.van\_der\_laarse@lumc.nl (A. van der Laarse)

---

**Time for primary review 29 days.**

therefore called ‘immediate-early’ (IE) genes. The induction of *c-fos*, *c-myc* and *hsp70* by hemodynamic overload was first reported in rat hearts [3–5]. As a later event, the expression of several genes is modulated either qualitatively or quantitatively. The expression of several genes that encode sarcomeric proteins is switched to expression of fetal isoforms, for example transition from cardiac  $\alpha$ -actin to skeletal  $\alpha$ -actin, and from the  $\alpha$ -form of myosin heavy chain (MHC) to the  $\beta$ -MHC form in rodents [6]. In addition, several shifts in isogene expression of proteins involved in energy metabolism have been described [7,8]. Furthermore, the expression of atrial natriuretic peptide (ANP) that is restricted to the atria shortly after birth, is re-expressed in the ventricles upon hemodynamic overload [5,9]. Besides the qualitative changes in gene expression described above, there are also quantitative changes in constitutive expression of genes, i.e. stimulation of gene expression which contribute to hypertrophy, and down-regulation of genes. Several genes that encode membrane proteins are down-regulated in hypertrophied hearts, for example, the sarcoplasmic reticulum  $\text{Ca}^{2+}$ -ATPase (SERCA) gene [10,11].

## 2. Stimuli inducing cardiac hypertrophy

### 2.1. Mechanical stress

The primary stimulus for cardiac hypertrophy is mechanical stress or an accompanying increase in neural or humoral factors. However, since cardiac hypertrophy can be induced by hemodynamic overload even after adreno-receptor blockade (humoral) or sympathectomy (neural) [12], it is likely that mechanical stress itself is the primary factor for cardiac hypertrophy in response to hemodynamic overload. Several *ex vivo* and *in vitro* experiments support this view. For example, in isolated hearts, increased cardiac load stimulated protein synthesis [13]. Furthermore, stretching cultured cardiomyocytes stimulated protein synthesis and induced alterations in gene expression without involvement of neural or humoral factors [14–18]. Moreover, *in vitro* experiments using stretched cardiomyocytes have demonstrated effects that were similar to those in the *in vivo* heart in response to hemodynamic overload, i.e. increased protein synthesis, expression of IE genes, and re-expression of fetal genes [14,15]. Thus, given these experimental findings, it appears that mechanical stress, such as hemodynamic overload, affects cardiomyocytes by stretch primarily.

### 2.2. Growth factors and hormones

Growth factors and hormones may be involved indirectly in hemodynamic overload-induced cardiac hypertrophy. The expression and/or release of these factors have been reported in hearts that are hypertrophied due to hemo-

dynamic overload, and in cardiomyocytes that are hypertrophied due to stretch. These factors include endothelin-1 (ET-1) [19–21], angiotensin II (Ang II) [22–24], transforming growth factor- $\beta$  (TGF- $\beta$ ) [25,26], insulin-like growth factor-1 (IGF-1) [21,26], myotrophin [27], and vascular endothelial growth factor (VEGF) [28,29]. Thus, cardiac myocytes and other cell types, such as cardiac fibroblasts, endothelial cells and vascular smooth muscle cells, may secrete growth promoting factors after a mechanical stress stimulus, which induce hypertrophy of cardiomyocytes in an autocrine/paracrine way.

## 3. Mechanosensors possibly implicated in cardiac hypertrophy

By which mechanisms is hemodynamic overload coupled to induction of intracellular signals that are responsible for the hypertrophic response? There are several candidate mechanisms that belong to two major groups: (i) integrins and the cytoskeleton, and (ii) sarcolemmal proteins.

### 3.1. Integrins and the cytoskeleton

Integrins are a family of cell-surface receptors that link the extracellular matrix (ECM) to the cellular cytoskeleton at places called focal adhesion sites [30–32]. Integrins are composed of  $\alpha$  and  $\beta$  subunit heterodimers that consist of a large extracellular domain, a transmembrane region, and usually a short cytoplasmic domain. The extracellular domain binds to proteins of the ECM or to counter-receptors on other cells, whereas the cytoplasmic domain forms links with cytoskeletal proteins and, as recently discovered, intracellular signaling molecules such as  $\alpha$ -actinin and focal adhesion kinase (FAK) [30,33]. Initially, integrins were considered solely as molecules necessary for adhesive interactions between cells and the ECM, regulating cell adhesion, cell growth, and cell motility. Nowadays, it is believed that integrins can also function as signal transducers, that regulate gene expression and cellular growth, at least in non-cardiac cells [34,35].

Stretch of cardiac fibroblasts caused activation of two signal transduction pathways (the so-called ERK and JNK pathway; see Sections 4.1.1 and 4.1.2, respectively) in an integrin ( $\beta_1$ )-dependent and matrix-specific way, indicating that integrins can act as mechanotransducers in cardiac cells [36]. Furthermore, Ross et al. [37] demonstrated that integrins influence the hypertrophic response in cardiomyocytes. Overexpression of  $\beta_1$  integrin in the cardiomyocyte was found to increase ANP expression and protein synthesis without affecting DNA synthesis. In addition, Kuppuswamy et al. [38] have shown an association of  $\beta_3$ -integrin and two non-receptor kinases, FAK and c-Src, with the cytoskeleton in hypertrophic cat hearts.

Upon integrin-induced phosphorylation of these kinases, they become activated, may recruit Grb2/Sos and then initiate the Ras/ERK signal transduction pathway [39].

There are two views on the mechanism of integrin-mediated signaling and these two views may be complementary [32]. In the first view, integrins transmit signals by organizing the cytoskeleton (actin filaments) through intermediary molecules including  $\alpha$ -actinin, talin, vinculin, paxillin, and tensin, thereby stabilizing cell adhesion and regulating cell shape, morphology, and motility [34]. In accordance with this view Wang et al. [40] showed that: (i)  $\beta$ 1 integrin induced focal adhesion formation and supported a force-dependent stiffening response; and that (ii) an increase in the cytoskeletal stiffness required an intact cytoskeleton. Their results suggest that mechanical stress is first received by integrins, and that next interlinked actin microfilaments transduce mechanical stress in concert with microtubules and intermediate filaments. Moreover, Bloom et al. [41] suggested that this mechanism even could modulate gene expression. They showed that intermediate filaments transmit mechanical stress to the chromatin and hypothesized that alterations in the chromatin induce modulation of gene expression. Mechanical stress-induced increases in sarcomere length changed the spatial arrangement of the desmin–laminin filament network that link Z-discs to the chromatin, thereby altering the distribution of chromatin, which may initiate gene transcription [41].

The second view is based on the recently discovered co-localization of signaling molecules in focal adhesion complexes (FACs). In this view integrins are regarded as true receptors capable of inducing biochemical signals within the cell that regulate gene expression and cellular growth. Upon clustering of integrins at focal adhesion sites they recruit the non-receptor kinases FAK and Src, cytoskeletal proteins, and signal-transducing molecules (such as Grb2, Sos, Ras, Raf, PLC $\gamma$ , ERKs, and SAPKs) forming FACs [32,42–44]. In these FACs signaling proteins and their substrates are brought into close proximity, thereby facilitating signal transduction. In fact, integrins may induce activation of FAK with the help of Src [39], which may lead to activation of the ERK pathway through Grb2-Sos-Ras [43] or through activation of PLC $\gamma$  [45]. Integrins can also collaborate with growth factor receptors and their substrates to phosphorylate their receptor kinases and to activate ERKs and JNKs upon ligand binding [46,47]. Thus, integrins may integrate a variety of different signaling pathways that are activated by both the ECM and growth factors to establish a well-coordinated response. This mechanism may be important in the hemodynamic overload-induced hypertrophic response that is probably induced not only by mechanical stress itself but also by growth factors released upon mechanical stress.

Furthermore, there is a mechanism proposed by Chicurel et al. [48] in which integrins recruit mRNA and ribosomes to FACs upon cell binding to the ECM and application of mechanical stress thereby relocating these protein synthesis

components near the sites of signal reception. This mechanism may serve to increase protein synthesis by post-transcriptional changes before gene expression is changed, or may serve to integrate signals that regulate protein synthesis with those signals that are elicited by integrins, growth-factor receptors and mechanical stresses within the same FAC [40,46–48].

Besides integrins, the ECM proteins ligated to the integrins, such as collagens, laminin, fibronectin, and vitronectin [30], play also a role in signal transduction. MacKenzie et al. [36] showed that if the cells were cultured on fibronectin, vitronectin, or laminin, stretch of cardiac fibroblasts activated JNK1 whereas stretch activated ERK2 only if the cells were plated on fibronectin. In addition, ECM proteins, such as laminin and collagens, can influence the myofibrillar and cytoskeletal assembly in cardiomyocytes [49]. Furthermore, it was found that besides integrins, heparan sulfate proteoglycans are involved in formation of focal adhesions and actin stress fibers acting cooperatively with integrins in generating signals in fibroblasts plated on fibronectin [50].

### 3.2. Sarcolemmal proteins: enzymes, ion channels and antiporters

Mechanical stress causes deformation of the sarcolemma which may (in)directly cause conformational changes in proteins (and subsequently activation of them) that are anchored to the inner surface of the cell membranes, or in transmembrane proteins. Examples of sarcolemmal proteins that might be affected by mechanical stress are several effector enzymes such as phospholipases and protein kinase C isoenzymes, ion channels such as the stretch-activated channel, or ion exchangers such as the Na<sup>+</sup>/H<sup>+</sup> exchanger.

#### 3.2.1. Phospholipase C and D (PLC and PLD)

Phospholipases are enzymes that catalyse the breakdown of plasma membrane phospholipids thereby generating second messenger molecules. Major families of phospholipase C (PLC) include a protein kinase-regulated PLC $\gamma$  family, a PLC $\delta$  family, and a G protein-regulated PLC $\beta$  family [51]. These families are all membrane-coupled and their catalytic activity is dependent on Ca<sup>2+</sup> [51]. A cytosolic PLC has also been reported (PLC<sub>cyt</sub>) that is regulated by the  $\beta\gamma$  subunit of a G protein [52]. The family of phospholipase D (PLD) very likely consists of multiple isoforms, however until now only two have been cloned: PLD1 and PLD2. PLD activation is regulated by small G proteins and PKC and probably by tyrosine kinases [53,54].

Activated PLC can hydrolyze phosphatidylinositol-bisphosphate (PIP<sub>2</sub>) into inositol-triphosphate (IP<sub>3</sub>) and diacylglycerol (DAG). DAG is a second messenger that causes translocation of PKC isoenzymes from the cytosol to a membrane fraction, thereby activating them [55].

Activated PKC may then reduce the action of PLC and stimulate that of PLD [56]. Activated PLD preferentially hydrolyzes phosphatidylcholine into phosphatidic acid (PtdOH) and choline. PtdOH is converted into DAG by the enzyme PtdOH hydrolase. Through the 'cross-talk' mechanism between PLC and PLD the cell may be supplied with DAG for a prolonged period of time, thereby providing a sustained response [56,57].

There is some evidence that activation of PLC or/and PLD may play a role in mechanical stress-induced hypertrophy of cardiomyocytes [58–60].

### 3.2.2. Protein kinase C (PKC)

Protein kinase C (PKC) is a serine/threonine protein kinase. The PKC family comprises several isoenzymes that differ in distribution, regulation, and enzymatic activity. The isoenzymes have been categorized into three subclasses: (i) conventional or classical PKCs (cPKCs:  $\alpha$ ,  $\beta$ , and  $\gamma$ ) which are regulated by DAG, phosphatidylserine, and  $\text{Ca}^{2+}$ ; (ii) novel PKCs (nPKCs:  $\delta$ ,  $\epsilon$ ,  $\eta$ ,  $\theta$ , and  $\mu$ ) which are regulated by DAG and phosphatidylserine, but not by  $\text{Ca}^{2+}$ ; and (iii) atypical PKCs (aPKCs:  $\zeta$  and  $\lambda$ ) whose regulation has to be defined although DAG and  $\text{Ca}^{2+}$  appear not to be involved [61,62]. The function of PKC is regulated by two mechanisms: (i) by phosphorylation that renders it catalytically competent and causes its release into the cytosol; and (ii) by second messengers (DAG, phosphatidylserine) that promote association of PKC with the membrane and activation by release of the pseudo-substrate [55,61].

Downstream signaling from activated PKC involves two main pathways: (i) indirect regulation of nuclear events; and (ii) direct regulation of nuclear events [63]. PKC can phosphorylate Raf directly or indirectly via Ras [64–66], thereby activating Raf and initiating the ERK pathway which results in activation and nuclear translocation of ERK [67]. Furthermore, PKC can phosphorylate proteins, such as I $\kappa$ B, that function as a cytoplasmic anchor for proteins that have nuclear functions such as the transcription factor NF $\kappa$ B (reviewed in [63]). Upon phosphorylation of I $\kappa$ B, NF $\kappa$ B is released and subsequently translocated to the cell nucleus where it exerts its function. On the other hand, evidence for a direct nuclear function of PKC is accumulating (reviewed in [63]). In cardiomyocytes, several PKC isoenzymes have been found to translocate from the cytosol to the nuclear envelope after stimulation with phorbol ester [68]. In addition to the two pathways described above, PKC may modify  $[\text{Ca}^{2+}]_i$  via Raf and MEK (components of the ERK pathway, see Section 4.1.1), in part by regulating the expression of SERCA, the calcium pump of the SR [69].

Activation of PKC in cardiomyocytes has been found to stimulate expression of *c-fos* and skeletal  $\alpha$ -actin genes [70] and to activate transcription of  $\beta$ -MHC, MLC-2a, and ANP [71,72] indicating that activation of PKC can induce hypertrophy. Moreover, stretch of cultured cardiomyocytes

induced IE gene expression and stimulated protein synthesis, both being suppressed by down-regulation of PKC [73].

### 3.2.3. Stretch-activated channels (SACs)

Activation of mechanosensitive ion channels has been proposed as the transduction mechanism between mechanical stress and cardiac hypertrophy (reviewed in Ref. [74]). These stretch-activated channels (SACs) allow passage of ions like  $\text{Na}^+$ ,  $\text{K}^+$  and  $\text{Ca}^{2+}$  [75].

Direct  $\text{Ca}^{2+}$  influx through SACs was reported in cultured chick heart cells that were stimulated by prodding with a pipette [76]. In addition, stretch of cultured cardiomyocytes increased  $[\text{Ca}^{2+}]_i$  levels most probably via activation of SACs, since this increase was blocked by pre-incubation of the SAC blockers streptomycin and gadolinium ions [77–79]. However, the involvement of SACs in transduction of the mechanical stress stimulus into the nucleus is still controversial. Several studies could not confirm that gadolinium inhibits stretch-induced expression of IE genes and protein synthesis [80–82].

There are several putative mechanisms by which  $[\text{Ca}^{2+}]_i$  may contribute to the development of cardiac hypertrophy. Increased  $[\text{Ca}^{2+}]_i$  may enhance PKC activity followed by direct or indirect alterations in gene expression (see above).  $[\text{Ca}^{2+}]_i$  can also regulate IE gene expression, such as *c-fos*. Elevated  $[\text{Ca}^{2+}]_i$  activates the calcium/calmodulin-dependent protein kinase, which can phosphorylate and activate cAMP response element-binding protein (CREB), a transcription factor. Upon binding to the calcium response element within the cAMP response element, CREB can induce transcription of *c-fos* (reviewed in Ref. [83]). In addition,  $[\text{Ca}^{2+}]_i$  regulates expression of several genes by affecting initiation of transcription, mRNA stability and the translation of mRNA into protein [83]. Furthermore,  $\text{Ca}^{2+}$  ions may also stimulate protein synthesis since it was shown that depletion of intracellular calcium stores inhibited protein synthesis (reviewed in Ref. [84]). Another putative mechanism by which  $\text{Ca}^{2+}$  ions may regulate hypertrophy involves the  $\text{Ca}^{2+}$ /calmodulin-dependent protein phosphatase, calcineurin (see Section 4.3).

### 3.2.4. The $\text{Na}^+/\text{H}^+$ exchanger (NHE)

The  $\text{Na}^+/\text{H}^+$  exchanger (NHE) may also play a role in mechanotransduction since its activation increases intracellular pH (cytoplasmic alkalization) which is known to stimulate expression of hypertrophic marker genes and protein synthesis [85]. NHE is located in the sarcolemma and regulates  $\text{Na}^+$  influx and  $\text{H}^+$  efflux with a stoichiometry of one to one [86,87].

Using cultured cardiomyocytes, Yamazaki et al. [82] showed that HOE 694, a specific inhibitor of NHE, markedly attenuated stretch-induced activation of the ERK pathway and stimulation of protein synthesis. Furthermore, stretch-induced activation of the MAPK pathway was partially blocked by pretreatment with  $\text{NH}_4\text{Cl}$  (intracellular

lar acidification), suggesting that cytoplasmic alkalization may be a crucial step to activate the ERK pathway in stretched cardiomyocytes. Autocrinely released Ang II or ET-1 was not related to the stretch-induced NHE activation. On the other hand, Cingolani et al. [88] found in papillary feline muscle that stretch induced a rise in  $pH_i$  which was completely blocked by specific inhibition of the NHE, by blockade of the Ang II type 1 receptor and the ET-1 type B receptor, and by inhibition of PKC. These authors concluded that stretch increases  $pH_i$  due to enhanced NHE activity which was mediated by PKC, and by autocrine/paracrine release of Ang II and/or ET-1. Thus, the NHE may play a role in converting mechanical stress into a biochemical signal although the influence of autocrine/paracrine factors awaits clarification.

### 3.2.5. Guanine nucleotide-binding proteins (G proteins)

Another candidate mechanism of mechanotransduction involves guanine nucleotide-binding proteins (G proteins) that couple cell surface receptors to the appropriate effectors. There are two forms of signal transducing G proteins: the ‘small G proteins’ and the ‘heterotrimeric G proteins’. These G proteins share a common characteristic: ‘they exist in two interconvertible conformational states, i.e. an inactive guanosine diphosphate (GDP)-bound state and an active guanosine triphosphate (GTP)-bound state’ (from Ref. [89]).

The small G proteins are single polypeptides composed of about 200 amino acids, such as the Ras family and Rho family. The Rho family appears to play a role in controlling the organization of the actin cytoskeleton, and in the formation of FACs, i.e. it regulates integrin clustering [90,91]. In addition, two members of the Rho family, namely cdc42 and Rac-1, have been shown to stimulate two distinct MAP kinase families, the JNKs and p38 MAPKs [92,93]. The Ras family is a well-known regulator of the ERK pathway, but mediates several other effector pathways as well, including the JNK pathway [94] (reviewed in Ref. [95]).

The heterotrimeric G proteins are associated with signal transduction originating from cell surface receptors. Heterotrimeric G protein subunits have been shown to be localized at sites of focal adhesions that provide contact via integrins with the ECM thereby functioning as a sensor of mechanical stress [96]. Stretch of cultured neonatal cardiac fibroblasts was found to stimulate G protein activation within 1 min of stretching, the response being modulated by the rate and the magnitude of mechanical stress. Furthermore, immunoprecipitation revealed that  $G\alpha_q$  and  $G\alpha_{i1}$  were the subunits that become rapidly activated upon mechanical stress [97]. Akhter et al. [98] reported an attenuation of pressure overload-induced hypertrophy in transgenic mice that expressed an inhibitor peptide of the  $G\alpha_q$  subunit. In addition, D’Angelo et al. [99] showed induction of marker genes of cardiac hypertrophy, increased heart weight in relation to body

weight, and increased cardiomyocyte size in transgenic mice that overexpressed  $G\alpha_q$  in a cardiac-specific manner. Activation of PKC appeared to be crucial in this G protein-induced hypertrophy. These studies demonstrated a vital role for heterotrimeric G proteins in mechanotransduction of mechanical stress and cardiac hypertrophy. Activation of heterotrimeric G proteins is a major activation mechanism of PLC, that subsequently can activate PKC [100]. Therefore it is an interesting hypothesis that integrins, heterotrimeric G proteins, PLC and PKC have an integrated action in mechanotransduction. Recently, evidence has been presented in favour of this hypothesis [101,102].

## 4. Signal transduction of the stretch stimulus

There are two main signal transduction pathways that may be involved in mechanical-stress induced hypertrophic response: (i) the mitogen-activated protein kinase (MAPK) pathway; and (ii) the Janus-associated kinases/signal transducers and activators of transcription (JAK/STAT) (Fig. 1). Nowadays, it is known that there are several interactions between these pathways. In fact, mechanical stress appears to activate both pathways. Recently, a novel

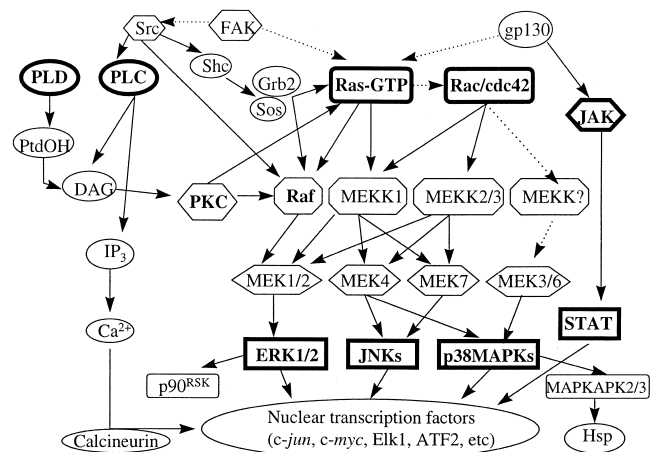

Fig. 1. Signal transduction pathways possibly involved in mechanical stress-induced hypertrophy. These include two major pathways: the MAPK pathway and the JAK/STAT pathway. The MAPK pathway is a three-module cascade of phosphorylating kinases: MEK→MEK→MAPK. This pathway consists of several subfamilies among which the ERK pathway, the JNK pathway and the p38 MAPK pathway. They are activated by heterotrimeric G proteins coupled to membrane receptors, by small G proteins (such as Ras, cdc42, Rac), by protein kinases (such as Src and FAK), by PKC via activation of PLC or/and PLD, or by JAKs via gp130. Their downstream targets are cytosolic kinases (such as p90<sup>RSK</sup>, and MAPKAPK2/3) and nuclear transcription factors (such as c-jun, c-myc, and Elk1). The JAK/STAT pathway is directly activated probably via gp130. Upon activation of STATs by JAKs, STATs translocate to the nucleus and induce gene transcription. In addition, a direct pathway linking mechanical stress to gene expression has been considered to be operative via the cytoskeleton. The involvement of calcineurin in the development of hypertrophy is still controversial. The dashed lines refer to poorly understood mechanisms.

hypertrophic signaling pathway has been described which involves activation of the  $\text{Ca}^{2+}$ /calmodulin-dependent phosphatase calcineurin [103]. These three pathways (Sections 4.1–4.3) control gene transcription and may therefore be involved in stretch-induced modulation of gene expression. The rate of protein synthesis is probably increased by a different mechanism (Section 4.4) although its involvement in the development of cardiac hypertrophy has to be proven.

#### 4.1. The mitogen-activated protein kinase (MAPK) pathway

Mitogen-activated protein kinases (MAPKs) are serine/threonine kinases that become activated upon tyrosine/threonine phosphorylation and additional modifications, and then in turn phosphorylate and activate nuclear substrates (such as *c-myc*, *c-jun*, ATF-2, and  $\text{p62}^{\text{TCF}}$ ) and other kinases (such as  $\text{p90}^{\text{RSK}}$  and MAPKAP kinase 2 [104,105]) (reviewed in Refs. [106,107]). The MAPKs are the final components of the MAPK pathway that consist of a three kinase modules [108–110]: (1) the MAP kinases (MAPKs), (2) the MAPK/ERK kinases (MEKs), and (3) the MEK kinases (MEKKs). The MEKKs are serine/threonine kinases that activate MEKs by dual phosphorylation on a serine and serine/threonine residue lying within a Ser-xxx-Ser/Thr motif [111]. MEKs activate MAPKs by dual phosphorylation on a tyrosine and a threonine residue lying within a Thr-xxx-Tyr motif, i.e. the phosphorylation motif [112]. MAPKs preferentially phosphorylate substrates on Ser/Thr-Pro, although the optimal sequence is Pro-xxx-Ser/Thr-Pro [106]. Thus, the MAPK pathway involves a cascade of phosphorylation of kinases in the following order: MEKK→MEK→MAPK.

The MAPK superfamily is a widely distributed group of enzymes that can be divided in several subfamilies. The three best characterized MAPK cascades are: (i) the extracellular-regulated kinases (ERKs); (ii) the c-Jun N-terminal kinases (JNKs); and (iii) the p38 MAPKs cascade, the latter two belong to the group of stress-activated protein kinases (SAPKs) [108,109,113,114]. The MAPK subfamilies all have different amino acids in their phosphorylation motif which helps to identify them (the above mentioned xxx is Glu for ERKs, Pro for JNKs, and Gly for p38 MAPKs) [108]. Furthermore, at the level of MEK the MAPK pathways may converge [115,116].

##### 4.1.1. The extracellular-regulated kinase (ERK) pathway

There are several extracellular-regulated kinases (ERKs): ERK1–6. The best characterized are: the 44-kDa MAPK (ERK1), the 42-kDa MAPK (ERK2), and the 63-kDa MAPK (ERK3) [117]. In the heart, ERK1 is the most highly expressed ERK. The expressions of three ERK subtypes (ERK1–3) decrease upon maturation; the expression of ERK3 is hardly detectable in adult heart [117]. The MEKs in this pathway are MEK1 and MEK2; the MEKKs

are Raf kinase [118,119] and also MEKK1 [110]. Substrates for ERKs are transcription factors, such as *c-jun*, and  $\text{p62}^{\text{TCF}}$  (Elk-1), and the 90-kDa S6 kinase ( $\text{p90}^{\text{RSK}}$ ) [104,106,107].

Raf with the cofactor 14-3-3 bound to it, is recruited to the membrane by Ras-GTP for phosphorylation by membrane-bound tyrosine kinases [120–122]. Upon phosphorylation of Raf by tyrosine kinases (for example by Src kinases via the linker protein Shc, the adapter protein Grb2, and the guanine nucleotide exchange factor Sos [123]) Raf becomes activated and can initiate the ERK pathway [121]. Alternatively, it has been reported that activation of Raf by Ras can occur without phosphorylation, probably mediated through a conformational change [124]. The activation of ERK2 by Raf however, seems to be Ras-independent [118]. This activation of Raf may involve another mechanism, i.e. via PLC and PKC (see Section 3.2.1), which is independent of tyrosine kinases and Ras [64,125]. Finally, there is a signal transduction pathway leading to ERK activation which involves protein kinase A (PKA) and may be  $\text{Ca}^{2+}$ -dependent [126,127]. The signal transduction pathways leading to ERK activation may differ among cell types (reviewed in Ref. [128]).

The ERK pathway can be stimulated upon G protein-coupled receptor occupation by binding of hormones (for example by binding of ET-1 [116] and Ang II [129]), and upon occupation of receptors with intrinsic tyrosine kinase activity by binding of growth factors (for example IGF-I [130]) (reviewed in Refs. [108,131,132]). Mechanical stress has also been reported to stimulate this pathway: activation of ERK1 and ERK2, Ras, and  $\text{p90}^{\text{RSK}}$  [59,126,133–138]. The precise mechanism of the stimulation of this pathway is unknown, but appears to involve PKC, tyrosine kinases, and Ras [133,136,137]. Moreover, stretch of cardiomyocytes caused activation of ERKs and resulted in increased expression of *c-fos* and skeletal  $\alpha$ -actin, indicating that ERKs and mechanical stress-induced hypertrophy may be linked [59,134]. However, ANP expression may be either not regulated [139] or down-regulated by the ERK cascade [140]. Taken together, these results indicate that the ERKs may partly participate in the mechanisms of mechanical stress-induced hypertrophy.

##### 4.1.2. The c Jun N-terminal protein kinase (JNK) pathway

The members of this pathway and the p38 MAPK pathway were initially identified as stress-activated protein kinases (SAPKs), since they were preferentially activated by environmental stress (reviewed in Ref. [107]). It has now become clear that they belong to two different pathways because of differences in their dual phosphorylation motif, in their upstream activators, and their downstream targets [114]. The c-Jun N-terminal kinases (JNKs) are named after the first substrate identified, the IE gene *c-jun* [141]. The JNKs are encoded by three genes that all produce multiple products by alternative splicing yielding

three isoforms: JNK1 (SAPK $\gamma$ ), JNK2 (SAPK $\alpha$ ), and JNK3 (SAPK $\beta$ ) (terminology after Ref. [114]) [141,142]. All isoforms have an apparent molecular weight of approximately 46 or 54 kDa [114,143]. The JNKs differ in their interaction with transcription factors which provides a tool for selectively targeting of specific transcription factors [143]. The upstream activators of JNKs are not well-defined and poorly studied in heart tissue. MEK4 and MEK7 appear to activate JNKs [107,144]. Furthermore, MEKK1 may be an upstream kinase of the JNK pathway, since it phosphorylates MEK4 which in turn phosphorylates and activates JNKs [145]. MEKK5 is probably also an upstream activator of MEK4 in the JNK pathway, at least in vitro [146]. Also MEKK2 and 3 are able to activate JNKs [110]. Initiation of the JNK pathway may be triggered by Rac and cdc42, members of the Rho family of small G proteins [92,93].

The JNK pathway may play a role in mechanical stress-induced hypertrophy via phosphorylation of the transcription factors c-Jun, and ATF2 [147]. In cardiomyocytes submitted to stretch, JNK activity was maximally increased at about 30 min [148]. This activation of JNKs was independent of secreted Ang II, extracellular Ca<sup>2+</sup>, and PKC. Others have found that cardiomyocytes submitted to cyclic stretch had a maximal activation of JNKs at about 5 min [133]. Using MEKK1-transfected cardiomyocytes, Thorburn et al. [140] showed that overexpression of MEKK1 induced ANP expression (a marker of hypertrophy). Moreover, MEKK1 stimulates JNKs as well as ERKs. However, the JNK pathway appeared to stimulate ANP expression, whereas the ERK pathway inhibited expression of ANP. Furthermore, these authors found that the small G protein Rho was also required for MEKK1-induced ANP expression [140]. Controversially, Nemoto et al. [149] found that activation of JNKs inhibited MEKK1-induced ANP expression via a feedback loop of *c-jun*. They reported that ANP expression is activated by p38 MAPKs. So, it seems that the induction of ANP expression is biphasic, first a short-living response upon JNK activation followed by a prolonged response upon p38 MAPK activation.

#### 4.1.3. The p38 MAPK pathway

Another subfamily of the MAPKs is the p38 MAPK family. Until now, four genes have been described encoding six isoforms: p38 MAPK $\alpha$ , p38 MAPK $\beta$ , p38 MAPK $\delta$ , and p38 MAPK $\gamma$  [150]). The substrate of p38 MAPK is MAPK-activated protein kinase 2 (MAPKAPK2) [151]. MAPKAPK2 can phosphorylate and thereby activate the small heat shock proteins Hsp 25 (the murine form) and Hsp27 (the human form) [152] that are supposed to be cytoprotective in heart cells [153]. The p38 MAPK cascade also results in phosphorylation of transcription factors, including ATF-2, which regulate gene expression. Upstream activators of the p38 MAPKs are

MEK3, MEK6, and probably MEK4 [150,154]. MEKK5 may serve as an upstream kinase of MEK6 [155].

The p38 MAPK pathway may be involved in mechanical stress-induced hypertrophy, since it was found recently that in a mouse model of pressure overload p38 MAPK activity was increased [156]. Furthermore, cyclic stretch of cardiomyocytes not only induced phosphorylation of the ERKs, JNKs, and FAK, but also of p38 MAPK [133]. These results were confirmed by other investigators who reported that stretch of cardiomyocytes derived from angiotensin II type 1a knock-out mice activated ERKs as well as p38 MAPK, followed by induction of *c-fos* expression [138]. To dissect specific functions of the p38 MAPKs, MEK3 and MEK6 were constitutively introduced into cardiomyocytes [150,154]. These experiments suggested that p38 MAPK $\beta$  is the subtype that mediates hypertrophy, whereas p38 MAPK $\alpha$  is involved in programmed cell death (apoptosis) [156]. Interestingly, the hypertrophic response induced by p38 MAPK $\beta$  included several markers of hypertrophy, i.e. an increase in cell surface area, enhanced organization of sarcomeric proteins, and induction of ANP expression [154,156].

In conclusion, all three subfamilies of MAPKs, i.e. ERKs, JNKs and p38 MAPKs, may play a role in the transduction of mechanical stress into a hypertrophic response. Their precise roles, i.e. induction of protein synthesis, induction of IE gene expression, induction of morphological changes by shifts in isoenzyme expression, and induction of ANP expression, however, await clarification.

#### 4.1.4. The mitogen-activated protein kinase phosphatases (MKPs)

A family of dual-specificity phosphatases, MAP kinase phosphatases (MKPs), can inactivate the MAPK cascades [157,158]. MKPs selectively dephosphorylate phosphothreonine and phosphotyrosine residues leading to inactivation of MAPKs. Until now, there are no studies performed to investigate the role of MKPs in mechanical stress-induced hypertrophy.

#### 4.2. The janus kinase/signal transducers and activators of transcription (JAK/STAT) pathway

Janus-associated kinases (JAKs) were first identified as protein tyrosine kinases associated with cytokine receptors that regulate signal transduction of these receptors [159]. The JAK family consists of Jak1, Jak2, Jak3, and Tyk2. They have a molecular mass ranging from 120 to 130 kDa [159]. Signal transducers and activators of transcription (STATs) are latent transcription factors located in the cytoplasm which become activated by phosphorylation on a tyrosine residue. They are named after their dual functions in signal transduction in the cytoplasm and activation of transcription in the nucleus [160,161]. Several

STAT isoforms have been identified: STAT1, 2, 3, 4, 5a, 5b, and 6 [160,161].

#### 4.2.1. The JAK/STAT cascade

Binding of ligands to their cytokine receptors, such as cardiotrophin-1 (CT-1) [162], leads to phosphorylation and activation of the receptor-JAK complex with subsequent recruitment of STATs and activation of STATs by phosphorylation. The phosphorylated STATs dimerize, migrate into the nucleus, and bind response elements in the promoters of target genes to stimulate gene transcription [159,161]. In case of receptor complexes sharing the glycoprotein 130 (gp130), i.e. members of the interleukin (IL)-6 family such as IL-6 and CT-1, signal transduction is triggered by the formation of dimers of gp130 [163]. Activation of STATs occurs also through receptor families other than the cytokine receptor family such as tyrosine kinase receptors [164] and G protein-coupled receptors (for example, Ang II receptor [165–167]).

The JAK/STAT pathway was found to be activated in rat hearts with pressure overload-induced hypertrophy [168,169]. Activation of the JAK/STAT pathway by overload was mediated by gp130, and at least CT-1 and IL-6 were involved in activation of this pathway [169]. Furthermore, Pan et al. [168] showed that activation of the JAK/STAT pathway by pressure overload contained an Ang II-dependent (Tyk2 and JAK2) and an angiotensin II-independent (JAK1) component. The Ang II-independent component may be represented by a mechanical stress component as illustrated by a later report of these authors [170]. They showed that stretch of cardiomyocytes induced phosphorylation of JAK1, JAK2, Tyk2, and gp130. Furthermore, STAT1 and STAT3 were activated of which the activation of STAT1 was Ang II-dependent. In addition, JAK2 activity was necessary for the stretch-induced STAT1 and STAT3 activation [170]. Stretch-induced secretion of ET-1 appeared not to be involved in phosphorylation of the STATs. Thus, although the participation of the JAK/STAT pathway in development of mechanical stress-induced hypertrophy is poorly studied, the involvement of JAK1, STAT3 and maybe JAK2 seems likely.

The transmembrane glycoprotein gp130 may play a major role in signal transduction since it has been found that gp130 is an upstream activator of the JAK/STAT pathway as well as the ERK pathway [171]. Interestingly, in stretched cardiomyocytes the JAK/STAT pathway is activated [170], and the ERK pathway is activated [133]. Even in cardiomyocytes derived from angiotensinogen-deficient mice that cannot produce Ang II, the ERK pathway is activated by stretch and this effect was regulated by gp130 [172]. Thus, mechanical stress-induced activation of both the ERK pathway and the JAK/STAT pathway may occur via gp130.

#### 4.2.2. Src homology phosphatases (SHPs)

The phosphorylation state and thus the activation state

of JAK2 (and possibly other kinases) is controlled by the action of Src homology phosphatase (SHP)-1 [173]. SHP-1 may downregulate the JAK/STAT cascade through dephosphorylation of JAK2 [174,175]. Another phosphatase which regulates protein tyrosine kinase activity is SHP-2 [173]. However, in contrast to SHP-1, SHP-2 probably functions as a positive effector of signal transduction [175,176]. SHP-2 may play a role as an adaptor protein for JAK2 association with G protein coupled receptors, thereby facilitating JAK2 phosphorylation and activation [175].

#### 4.3. Calcineurin-dependent pathway

Recently, Molkentin et al. [103] showed that cardiac hypertrophy can be induced by the  $\text{Ca}^{2+}$ /calmodulin-dependent phosphatase calcineurin. Transgenic mice that expressed activated forms of calcineurin developed cardiac hypertrophy that could be prevented by cyclosporine, an inhibitor of calcineurin [103]. In addition, cyclosporine also suppressed, besides development of hypertrophy, re-expression of a fetal gene repertoire in cardiomyocytes when stimulated in vitro with Ang II and phenylephrine. Activation of calcineurin dephosphorylates the cytoplasmic transcription factor NF-AT3, that subsequently migrates into the nucleus and interacts with the GATA4 transcription factor to synergistically upregulate gene expression [103]. This calcineurin-dependent pathway may link increases in  $[\text{Ca}^{2+}]_i$  with induction of cardiac hypertrophy. The involvement of calcineurin in development of cardiac hypertrophy was confirmed by Sussman et al. [177] and Shimoyama et al. [178]. Sussman et al. [177] reported that cyclosporine treatment prevented pressure overload-induced cardiac hypertrophy. Shimoyama et al. [178] reported that a calcineurin inhibitor FK506, inhibited activation of calcineurin and prevented pressure overload-induced cardiac hypertrophy and fibrosis. However, other studies failed to show that cyclosporine suppresses the development of cardiac hypertrophy in rodents with hemodynamic overload in vivo [179,180]. Whether hemodynamic overload activates calcineurin, and whether calcineurin activation plays a crucial role in the development of overload-induced cardiac hypertrophy, remains uncertain at this time.

#### 4.4. Regulation of protein synthesis

The increase in the rate of protein synthesis observed in cardiac hypertrophy may be regulated by phosphorylatable heat- and acid-stable protein I (PHAS-I) in the rat and its human homologue eukaryotic initiation factor 4E binding protein (eIF4E-BP) (reviewed in Refs. [108,181]). PHAS-I is involved in initiation of translation of RNA into protein. PHAS-I limits initiation of translation by binding to the eukaryotic initiation factor 4E (eIF4E). Upon phosphorylation of PHAS-I, the PHAS-I/eIF4E complex dissociates, thereby removing the inhibitory effect of PHAS-I on eIF4E and translation is initiated [182]. Phosphorylation of



PHAS-I is mediated by the kinase mammalian target of rapamycin (mTOR) [182], and not by the ERK pathway as was initially assumed [183].

Another mechanism by which the protein synthesis may be stimulated is through activation of the 70-kDa S6 kinase (p70<sup>S6K</sup>). S6 is a component of 40S ribosomal proteins, that regulates initiation and elongation of protein translation [184]. Upon phosphorylation of S6 by S6 kinases, protein synthesis is stimulated. Initially it was assumed that the 90-kDa ribosomal S6 kinase (p90<sup>RSK</sup>) was involved in phosphorylation of S6 [185]. Nowadays it has been suggested that p70<sup>S6K</sup> is the physiological S6 kinase [186].

### 5. Interaction between cardiomyocytes and cardiac fibroblasts: autocrine/paracrine mechanisms

The development of cardiac hypertrophy induced by hemodynamic overload is very likely triggered by mechanical stress. However, the involvement of growth promoting factors (such as TGF- $\beta$  and VEGF), hormones (such as Ang II and ET-I) and cytokines (such as CT-1) cannot be ruled out. We support the view that they are released upon mechanical stress and then act on neighbouring cells. This view is based on a study performed by Sadoshima et al. [59], who found that if stretch-conditioned medium derived from stretched cardiomyocytes is transferred to non-stretched cardiomyocytes, this stretch-conditioned medium induces hypertrophy in the recipient non-stretched cardiomyocytes. Released factors may act on the cells themselves (autocrine mechanism) and on other cell types (paracrine mechanism). The growth promoting factors that were proposed to play a major role in mechanical stress-induced hypertrophy are Ang II, ET-1, and TGF- $\beta$ .

#### 5.1. Angiotensin II (Ang II)

Angiotensin II (Ang II) is the effector peptide of the renin–angiotensin system (RAS). Nowadays, there is evidence for RAS systems in tissues, such as the myocardium [187]. Not all RAS components are synthesized in the tissue itself, but ‘there is a system generating Ang II locally rather than a local RAS’ (from Ref. [188]). This locally produced Ang II is known as a factor capable of inducing hypertrophy of cardiomyocytes and hyperplasia of cardiac fibroblasts [189,190].

Mechanical stress of cardiomyocytes induces angiotensinogen expression and promotes Ang II release from secretory granules [22,24,191]. Moreover, upon stretch of cardiomyocytes the increase in *c-fos*, *Egr-1*, skeletal  $\alpha$ -actin and ANP expression, as well as enhanced protein synthesis were suppressed or even completely blocked by an Ang II type 1 (AT<sub>1</sub>) receptor blocker [22,24,192]. In addition, the hypertrophic effect of conditioned medium (CM) derived from stretched cardiomyocytes on non-

stretched recipient cardiomyocytes was inhibited by addition of an AT<sub>1</sub> receptor blocker to the CM [22,193]. In vivo studies using spontaneously hypertensive rats showed that hypertension-induced cardiac hypertrophy was significantly reduced by treatment with an AT<sub>1</sub> receptor blocker [192]. However, mechanical stress of cardiomyocytes induced ERK activity and stimulated protein synthesis, which were only partially suppressed by an AT<sub>1</sub> receptor blocker [193]. Also, in cardiomyocytes derived from AT<sub>1A</sub> receptor knockout mice (cardiomyocytes from these rats have no transcripts of AT<sub>1A</sub> genes, and neither the AT<sub>1B</sub> nor AT<sub>2</sub> gene are upregulated) mechanical stress still activated ERK activity [138]. Moreover, studies performed in AT<sub>1A</sub> receptor knockout mice (that have no detectable AT<sub>1A</sub> mRNA levels, and very low AT<sub>1B</sub> mRNA levels) showed that pressure overload still induced hypertrophic responses without affecting AT<sub>1</sub> or AT<sub>2</sub> mRNA levels [194,195]. These experiments indicate that ‘AT<sub>1</sub>-mediated Ang II signaling is not essential for the development of pressure-overload-induced cardiac hypertrophy’ [195].

#### 5.2. Endothelin-1 (ET-1)

Endothelin-1 (ET-1) is a vasoconstrictor peptide originally identified from the supernatant of cultured porcine aortic endothelial cells [196]. In cardiomyocytes, ET-1 stimulated hypertrophy as determined by an increase in protein synthesis and cell surface area, expression of IE genes, and induction of ANP, skeletal  $\alpha$ -actin, and MLC2a genes [197–199].

Contribution of local ET-1 to hypertrophy of cardiomyocytes was demonstrated by an increase in ventricular ET-1 levels during pressure overload, which showed a positive correlation with the degree of hypertrophy [20]. In situ mRNA hybridization revealed that preproET-1 mRNA was expressed in hypertrophied cardiomyocytes, suggesting that cardiomyocytes can be a source of ET-1 production in hypertrophied hearts [20]. In addition, stretch of cultured cardiomyocytes increased preproET-1 mRNA expression and stimulated the release of ET-1 [19]. A specific ET-1 receptor blocker suppressed the increase in protein synthesis and the activation of Raf and ERK in stretched cardiomyocytes, suggesting a role for ET-1 in mechanical stress-induced hypertrophy [19]. These experiments were confirmed by an in vivo study. In rats submitted to hemodynamic overload, cardiac hypertrophy with concomitant expression of the skeletal  $\alpha$ -actin and ANP was partially blocked by the action of an ET-1 type A (ET<sub>A</sub>) receptor blocker [200].

#### 5.3. Transforming growth factor-beta (TGF- $\beta$ )

There are three distinct forms of transforming growth factor-beta (TGF- $\beta$ ), TGF- $\beta$ <sub>1</sub> [201], TGF- $\beta$ <sub>2</sub>, and TGF- $\beta$ <sub>3</sub> [202,203]. TGF- $\beta$  is secreted in a latent form, and proba-

bly becomes activated upon proteolytic cleavage by proteases [204].

The view that TGF- $\beta_1$  may play a role in cardiac hypertrophy has derived from two observations: (i) TGF- $\beta_1$  induced expression of collagen mRNA followed by deposition of collagen proteins by cardiac fibroblasts; and (ii) TGF- $\beta_1$  induced expression of  $\beta$ -MHC and skeletal  $\alpha$ -actin in cardiomyocytes [205]. In pressure overloaded hearts, TGF- $\beta_1$  mRNA was increased considerably, TGF- $\beta_3$  mRNA levels were unchanged, and expression of ECM proteins such as fibronectin and collagen was increased [25,206]. Other investigators showed that this increase in TGF- $\beta_1$  mRNA expression upon pressure overload occurred in cardiomyocytes mainly, although basal TGF- $\beta_1$  mRNA was localized in fibroblasts predominantly [207]. Upon hypertrophic stimuli such as norepinephrine and stretch, cardiomyocytes secreted increased quantities of TGF- $\beta_1$  [207]. Together, these results implicate an autocrine as well as a paracrine role for TGF- $\beta$  in induction of cardiac hypertrophy, i.e. secretion by cardiomyocytes followed by hypertrophy of cardiomyocytes and increased deposition of ECM proteins by fibroblasts, respectively [208].

## 6. Conclusions

The identification of integrins, G proteins, and the Na<sup>+</sup>/H<sup>+</sup> exchanger as potential mechanosensors, and MAPK and JAK/STAT pathways as potential participants in mechanical stress-induced signal transduction is of great interest. The role of the calcineurin-dependent pathway in mechanical stress-induced hypertrophy is still controversial. Release of growth-promoting factors, such as angiotensin II, endothelin-1, and transforming growth factor- $\beta$ , upon stretch may stimulate cardiac hypertrophy in an autocrine/paracrine way.

These potential mechanisms that may contribute to overall hypertrophic growth and changed cardiac phenotype have been identified using cell culture data and other models of hypertrophy. Whether these mechanisms apply to pathophysiological hypertrophy induced by mechanical stress in humans is still uncertain. Nevertheless, the data summarized here elucidate the many mechanisms that are involved in development of mechanical stress-induced hypertrophy. It is to be expected that future development of antagonists of specific mechanisms implicated in the development of cardiac hypertrophy will lead to new therapeutic strategies to prevent or treat deleterious consequences of cardiac hypertrophy, such as heart failure.

## References

- [1] Cooper IV G. Cardiocyte adaptation to chronically altered load. *Annu Rev Physiol* 1987;49:501–518.
- [2] Mondry A, Swynghedauw B. Biological adaptation of the myocardium to chronic mechanical overload. Molecular determinants of the autonomic nervous system. *Eur Heart J* 1995;16(supplement 1):64–73.
- [3] Mulvagh SL, Michael LH, Perryman MB, Roberts R, Schneider MD. A hemodynamic load in vivo induces cardiac expression of the cellular oncogene, *c-myc*. *Biochem Biophys Res Commun* 1987;147:627–636.
- [4] Komuro I, Kurabayashi M, Takaku F, Yazaki Y. Expression of cellular oncogenes in the myocardium during the developmental stage and pressure-overload hypertrophy of the rat heart. *Circ Res* 1988;62:1075–1079.
- [5] Izumo S, Nadal-Ginard B, Mahdavi V. Protooncogene induction and reprogramming of cardiac gene expression produced by pressure overload. *Proc Natl Acad Sci USA* 1988;85:339–343.
- [6] Schwartz K, de la Bastie D, Bouveret P, Oliviero P, Alonso S, Buckingham M.  $\alpha$ -Skeletal muscle actin mRNAs accumulate in hypertrophied adult rat hearts. *Circ Res* 1986;59:551–555.
- [7] Revis NW, Thomson RY, Cameron AJV. Lactate dehydrogenase isoenzymes in the human hypertrophic heart. *Cardiovasc Res* 1977;11:172–176.
- [8] Meerson FZ, Javich MP. Isoenzyme pattern and activity of myocardial creatine phosphokinase under heart adaptation to prolonged overload. *Basic Res Cardiol* 1982;77:349–358.
- [9] Mercadier JJ, Samuel J, Michel J et al. Atrial natriuretic factor gene expression in rat ventricle during experimental hypertension. *Am J Physiol* 1989;257:H979–H987.
- [10] Anger M, Lompré A, Vallot O, Marotte F, Rappaport L, Samuel J. Cellular distribution of Ca<sup>2+</sup> pumps and Ca<sup>2+</sup> release channels in rat cardiac hypertrophy induced by aortic stenosis. *Circulation* 1998;98:2477–2486.
- [11] Nagai R, Zarain-Herzberg A, Brandl CJ et al. Regulation of myocardial Ca<sup>2+</sup>-ATPase and phospholamban mRNA expression in response to pressure overload and thyroid hormone. *Proc Natl Acad Sci USA* 1989;86:2966–2970.
- [12] Cooper IVG, Kent RL, Uboh CE, Thompson EW, Marino TA. Hemodynamic versus adrenergic control of cat right ventricular hypertrophy. *J Clin Invest* 1985;75:1403–1414.
- [13] Kira Y, Kochel PJ, Gordon EE, Morgan HE. Aortic perfusion pressure as a determinant of cardiac protein synthesis. *Am J Physiol* 1984;246:C247–C258.
- [14] Sadoshima J, Jahn L, Takahashi T, Kulik TJ, Izumo S. Molecular characterization of the stretch-induced adaptation of cultured cardiac cells. An in vitro model of load-induced cardiac hypertrophy. *J Biol Chem* 1992;267:10551–10560.
- [15] Komuro I, Kaida T, Shibasaki Y et al. Stretching cardiac myocytes stimulates protooncogene expression. *J Biol Chem* 1990;265:3595–3598.
- [16] Kira Y, Nakaoka T, Hashimoto E, Okabe F, Asano S, Sekine I. Effect of long-term cyclic mechanical load on protein synthesis and morphological changes in cultured myocardial cells from neonatal rat. *Cardiovasc Drugs Ther* 1994;8:251–262.
- [17] Vandenburgh HH, Solerssi R, Shansky J, Adams JW, Henderson SA, Lemaire J. Response of neonatal rat cardiomyocytes to repetitive mechanical stimulation in vitro. *Ann NY Acad Sci* 1995;752:19–29.
- [18] Mann DL, Kent RL, Cooper IVG. Load regulation of the properties of adult feline cardiocytes: growth induction by cellular deformation. *Circ Res* 1989;64:1079–1090.
- [19] Yamazaki T, Komuro I, Kudoh S et al. Endothelin-1 is involved in mechanical stress-induced cardiomyocyte hypertrophy. *J Biol Chem* 1996;271:3221–3228.
- [20] Arai M, Yoguchi A, Iso T et al. Endothelin-1 and its binding sites are upregulated in pressure overload cardiac hypertrophy. *Am J Physiol* 1995;268:H2084–H2091.
- [21] Neri Serneri GG, Modesti PA, Boddi M et al. Cardiac growth factors in human hypertrophy. Relations with myocardial contractility and wall stress. *Circ Res* 1999;85:57–67.

- [22] Sadoshima J, Xu Y, Slayter HS, Izumo S. Autocrine release of angiotensin II mediates stretch-induced hypertrophy of cardiac myocytes in vitro. *Cell* 1993;75:977–984.
- [23] Tamura K, Umemura S, Nyui N et al. Activation of angiotensinogen gene in cardiac myocytes by angiotensin II and mechanical stretch. *Am J Physiol* 1998;275:R1–R9.
- [24] Miyata S, Haneda T, Osaki J, Kikuchi K. Renin–angiotensin system in stretch-induced hypertrophy of cultured neonatal rat heart cells. *Eur J Pharmacol* 1996;307:81–88.
- [25] Villarreal FJ, Dillmann WH. Cardiac hypertrophy-induced changes in mRNA levels for TGF- $\beta_1$ , fibronectin, and collagen. *Am J Physiol* 1992;262:H1861–H1866.
- [26] Calderone A, Takahashi N, Izzo NJJ, Thaik CM, Colucci WS. Pressure- and volume-induced left ventricular hypertrophies are associated with distinct myocyte phenotypes and differential induction of peptide growth factor mRNAs. *Circulation* 1995;92:2385–2390.
- [27] Sen S, Kundu G, Mekhail N, Castel J, Misono K, Healy B. Myotrophin: purification of a novel peptide from spontaneously hypertensive rat heart that influences myocardial growth. *J Biol Chem* 1990;265:16635–16643.
- [28] Seko Y, Seko Y, Takahashi N, Shibuya M, Yazaki Y. Pulsatile stretch stimulates vascular endothelial growth factor (VEGF) secretion by cultured rat cardiac myocytes. *Biochem Biophys Res Commun* 1999;254:462–465.
- [29] Li J, Hampton T, Morgan JP, Simons M. Stretch-induced VEGF expression in the heart. *J Clin Invest* 1997;100:18–24.
- [30] Hynes RO. Integrins: versatility, modulation and signaling in cell adhesion (review). *Cell* 1992;69:11–25.
- [31] Schwartz MA, Schaller MD, Ginsberg MH. Integrins: emerging paradigms of signal transduction. *Annu Rev Cell Dev Biol* 1995;11:549–599.
- [32] Juliano RL, Haskill S. Signal transduction from the extracellular matrix (minireview). *J Cell Biol* 1993;120:577–585.
- [33] Lewis JM, Schwartz AM. Mapping in vivo associations of cytoplasmic proteins with integrin  $\beta_1$  cytoplasmic domain mutants. *Mol Biol Cell* 1995;6:151–160.
- [34] Ingber D. Integrins as mechanochemical transducers (review). *Curr Opin Cell Biol* 1991;3:841–848.
- [35] Chen CS, Mrksich M, Huang S, Whitesides GM, Ingber DE. Geometric control of cell life and death. *Science* 1997;276:1425–1428.
- [36] MacKenna DA, Dolfi F, Vuori K, Ruoslahti E. Extracellular signal-regulated kinase and c-Jun NH $_2$ -terminal kinase activation by mechanical stretch is integrin-dependent and matrix-specific in rat cardiac fibroblasts. *J Clin Invest* 1998;101:301–310.
- [37] Ross RS, Pham C, Shai S et al.  $\beta_1$  Integrins participate in the hypertrophic response of rat ventricular myocytes. *Circ Res* 1998;82:1160–1172.
- [38] Kuppuswamy D, Kerr C, Narishige T, Kasi VS, Menick DR, Cooper G. Association of tyrosine-phosphorylated c-Src with the cytoskeleton of hypertrophying myocardium. *J Biol Chem* 1997;272:4500–4508.
- [39] Parsons JT, Parsons SJ. Src family protein tyrosine kinases: cooperating with growth factor and adhesion signaling pathways. *Curr Opin Cell Biol* 1997;9:187–192.
- [40] Wang N, Butler JP, Ingber DE. Mechanotransduction across the cell surface and through the cytoskeleton. *Science* 1993;260:1124–1127.
- [41] Bloom S, Lockard VG, Bloom M. Intermediate filament-mediated stretch-induced changes in chromatin: a hypothesis for growth initiation in cardiac myocytes. *J Mol Cell Cardiol* 1996;28:2123–2127.
- [42] Clark EA, Brugge JS. Integrins and signal transduction pathways: The road taken (review). *Science* 1995;268:233–239.
- [43] Shyy JY, Chien S. Role of integrins in cellular responses to mechanical stress and adhesion. *Curr Opin Cell Biol* 1997;9:707–713.
- [44] Miyamoto S, Teramoto H, Coso OA et al. Integrin function: Molecular hierarchies of cytoskeletal and signaling molecules. *J Cell Biol* 1995;131:791–805.
- [45] Zhang X, Chattopadhyay A, Ji Q et al. Focal adhesion kinase promotes phospholipase C- $\gamma_1$  activity. *Proc Natl Acad Sci USA* 1999;96:9021–9026.
- [46] Plopper GE, McNamee HP, Dike LE, Bojanowski K, Ingber DE. Convergence of integrin and growth factor receptor signaling pathways within the focal adhesion complex. *Mol Biol Cell* 1995;6:1349–1365.
- [47] Miyamoto S, Teramoto H, Gutkind JS, Yamada KM. Integrins can collaborate with growth factors for phosphorylation of receptor tyrosine kinases and MAP kinase activation: roles of integrin aggregation and occupancy of receptors. *J Cell Biol* 1996;136:1633–1642.
- [48] Chicurel ME, Singer RH, Meyer CJ, Ingber DE. Integrin binding and mechanical tension induce movement of mRNA and ribosomes to focal adhesions. *Nature* 1998;392:730–733.
- [49] Hilenski LL, Terracio L, Borg TK. Myofibrillar and cytoskeletal assembly in neonatal rat cardiac myocytes cultured on laminin and collagen. *Cell Tissue Res* 1991;264:577–587.
- [50] Saoncella S, Echtermeyer F, Denhez F et al. Syndecan-4 signals cooperatively with integrins in a Rho-dependent manner in the assembly of focal adhesions and actin stress fibers. *Proc Natl Acad Sci USA* 1999;96:2805–2810.
- [51] Rhee SG, Choi KD. Regulation of inositol phospholipid-specific phospholipase C isozymes (minireview). *J Biol Chem* 1992;267:12393–12396.
- [52] Blank JL, Brattain KA, Exton JH. Activation of cytosolic phosphoinositide phospholipase C by G-protein  $\beta\gamma$  subunits. *J Biol Chem* 1992;267:23069–23075.
- [53] Exton JH. Phosphatidylcholine breakdown and signal transduction (review). *Biochim Biophys Acta* 1994;1212:26–42.
- [54] Exton JH. Phospholipase D: enzymology, mechanisms of regulation, and function. *Physiol Rev* 1997;77:303–320.
- [55] Newton AC. Protein kinase C: structure, function, and regulation (minireview). *J Biol Chem* 1995;270:28495–28498.
- [56] Nishizuka Y. Intracellular signalling by hydrolysis of phospholipids and activation of protein kinase C. *Science* 1992;258:607–614.
- [57] Eskildsen-Helmond YEG, Bezstarosti K, Dekkers DHW, VanHeugten HAA, Lamers MJM. Cross-talk between receptor-mediated phospholipase C- $\beta$  and D via protein kinase C as intracellular signal possibly leading to hypertrophy in serum-free cultured cardiomyocytes. *J Mol Cell Cardiol* 1997;29:2545–2559.
- [58] Von Harsdorf R, Lang RE, Fullerton M, Woodcock EA. Myocardial stretch stimulates phosphatidylinositol turnover. *Circ Res* 1989;65:494–501.
- [59] Sadoshima J, Izumo S. Mechanical stretch rapidly activates multiple signal transduction pathways in cardiac myocytes: potential involvement of an autocrine/paracrine mechanism. *EMBO J* 1993;12:1681–1692.
- [60] Dassouli A, Sulpice J, Roux S, Crozatier B. Stretch-induced inositol triphosphate and tetraakisphosphate production in rat cardiomyocytes. *J Mol Cell Cardiol* 1993;25:973–982.
- [61] Newton AC. Regulation of protein kinase C (review). *Curr Opin Cell Biol* 1997;9:161–167.
- [62] Puceat M, Vassort G. Signalling by protein kinase C isoforms in the heart. *Mol Cell Biochem* 1996;157:65–72.
- [63] Buchner K. Protein kinase C in the transduction of signals toward and within the cell nucleus (review). *Eur J Biochem* 1995;228:211–221.
- [64] Kolch W, Heidecker G, Kochs G et al. Protein kinase C $\alpha$  activates RAF-1 by direct phosphorylation. *Nature* 1993;364:249–252.
- [65] Wood KW, Sarnecki C, Roberts TM, Blenis J. *Ras* mediates nerve growth factor receptor modulation of three signal-transducing protein kinases: MAP kinase, Raf-1, and RSK. *Cell* 1992;68:1041–1050.

- [66] Montessuit C, Thorburn A. Activation of Ras by phorbol esters in cardiac myocytes. Role of guanine nucleotide exchange factors. *FEBS Lett* 1999;460:57–60.
- [67] Lenormand P, Sardet C, Pagès G, L'Allemain G, Brunet A, Pouyssegur J. Growth factors induce nuclear translocation of MAP kinases (p42<sup>mapk</sup> and p44<sup>mapk</sup>) but not of their activator MAP kinase kinase (p45<sup>mapkk</sup>) in fibroblasts. *J Cell Biol* 1993;122:1079–1088.
- [68] Disatnik M, Buraggi G, Mochly-Rosen D. Localization of protein kinase C isoenzymes in cardiac myocytes. *Exp Cell Res* 1994;210:287–297.
- [69] Ho PD, Zechner DK, He H, Dillmann WH, Glembotski CC, McDonough PM. The Raf-MEK-ERK cascade represents a common pathway for alteration of intracellular calcium by Ras and protein kinase C in cardiac myocytes. *J Biol Chem* 1998;273:21730–21735.
- [70] Komuro I, Katoh Y, Kaida T et al. Mechanical loading stimulates cell hypertrophy and specific gene expression in cultured rat cardiac myocytes. *J Biol Chem* 1991;266:1265–1268.
- [71] Kariya K, Karns LR, Simpson PC. Expression of a constitutively activated mutant of the  $\beta$ -isozyme of protein kinase C in cardiac myocytes stimulates the promoter of the  $\beta$ -myosin heavy chain isogene. *J Biol Chem* 1991;266:10023–10026.
- [72] Shubeita HE, Martinson EA, Van Bilsen M, Chien KR, Brown JH. Transcriptional activation of the cardiac myosin light chain 2 and atrial natriuretic factor genes by protein kinase C in neonatal rat ventricular myocytes. *Proc Natl Acad Sci USA* 1992;89:1305–1309.
- [73] Yazaki Y, Komuro I, Yamazaki T et al. Role of protein kinase system in the signal transduction of stretch-mediated protooncogene expression and hypertrophy of cardiac myocytes. *Mol Cell Biochem* 1993;119:11–16.
- [74] Hu H, Sachs F. Stretch-activated ion channels in the heart (review). *J Mol Cell Cardiol* 1997;29:1511–1523.
- [75] Ruknudin A, Sachs F, Bustamante JO. Stretch-activated ion channels in tissue-cultured chick heart. *Am J Physiol* 1993;264:H960–H972.
- [76] Sigurdson W, Ruknudin A, Sachs F. Calcium imaging of mechanically induced fluxes in tissue-cultured chick heart: a role of stretch-activated ion channels. *Am J Physiol* 1992;262:H1110–H1115.
- [77] Gannier F, White E, Garnier D, LeGuenec J. A possible mechanism for large stretch-induced increase in  $[Ca^{2+}]_i$  in isolated guinea-pig ventricular myocytes. *Cardiovasc Res* 1996;32:158–167.
- [78] Gannier F, White E, Lacampagne A, Garnier D, Le Guenec J. Streptomycin reverses a large stretch-induced increase in  $[Ca^{2+}]_i$  in isolated guinea pig ventricular myocytes. *Cardiovasc Res* 1994;28:1193–1198.
- [79] Tatsukawa Y, Kiyosue T, Arita M. Mechanical stretch increases intracellular calcium concentration in cultured ventricular cells from neonatal rats. *Heart Vessels* 1997;12:128–135.
- [80] Sadoshima J, Takahashi T, Jahn L, Izumo S. Roles of mechanosensitive ion channels, cytoskeleton, and contractile activity in stretch-induced immediate-early gene expression and hypertrophy of cardiac myocytes. *Proc Natl Acad Sci USA* 1992;89:9905–9909.
- [81] Sadoshima J, Izumo S. Mechanotransduction in stretch-induced hypertrophy of cardiac myocytes. *J Receptor Res* 1993;13:777–794.
- [82] Yamazaki T, Komuro I, Kudoh S et al. Role of ion channels and exchangers in mechanical stretch-induced cardiomyocyte hypertrophy. *Circ Res* 1998;82:430–437.
- [83] Rosen LB, Ginty DD, Greenberg ME. Calcium regulation of gene expression. *Adv Sec Mess Phosphoprotein Res* 1995;30:225–253.
- [84] Palfrey HC, Nairn AC. Calcium-dependent regulation of protein synthesis. *Adv Sec Mess Phosphoprotein Res* 1995;30:191–223.
- [85] Fuller SJ. Stimulation of gene expression in neonatal cardiac myocytes by raised extracellular pH. *Biochem Soc Trans* 1997;25:210S.
- [86] Grinstein S, Rotin D, Mason MJ.  $Na^+/H^+$  exchange and growth factor-induced cytosolic pH changes. Role in cellular proliferation. *Biochim Biophys Acta* 1989;988:73–97.
- [87] Karmazyn M, Gan XT, Humphreys RA, Yoshida H, Kusumoto K. The myocardial  $Na^+-H^+$  exchange. Structure, regulation and its role in heart disease. *Circ Res* 1999;85:777–786.
- [88] Cingolani HE, Alvarez BV, Ennis IL, Camilión de Hurtado MC. Stretch-induced alkalization of feline papillary muscle: an autocrine–paracrine system. *Circ Res* 1998;83:775–780.
- [89] Hall A. The cellular functions of small GTP-binding proteins (review). *Science* 1990;249:635–640.
- [90] Parsons JT. Integrin-mediated signalling: regulation by protein tyrosine kinases and small GTP-binding proteins. *Curr Opin Cell Biol* 1996;8:146–152.
- [91] Tapon N, Hall A. Rho, Rac, and Cdc42 GTPases regulate the organization of the cytoskeleton. *Curr Opin Cell Biol* 1997;9:86–92.
- [92] Coso OA, Chiariello M, Yu J et al. The small GTP-binding proteins Rac1 and CDC42 regulate the activity of the JNK/SAPK signaling pathway. *Cell* 1995;81:1137–1146.
- [93] Minden A, Lin A, Claret F, Abo A, Karin M. Selective activation of the JNK signaling cascade and c-Jun transcriptional activity by the small GTPases Rac and cdc42Hs. *Cell* 1995;81:1147–1157.
- [94] Minden A, Lin A, McMahon M et al. Differential activation of ERK and JNK mitogen-activated protein kinases by Raf-1 and MEKK. *Science* 1994;266:1719–1723.
- [95] Vojtek AB, Der CJ. Increasing complexity of the Ras signaling pathway (review). *J Biol Chem* 1998;273:19925–19928.
- [96] Hansen CA, Schroering AG, Carey DJ, Robishaw JD. Localization of a heterotrimeric G protein  $\gamma$  subunit to focal adhesion and associated stress fibers. *J Cell Biol* 1994;126:811–819.
- [97] Gudi SRP, Lee AA, Clark CB, Frangos JA. Equibiaxial strain and strain rate stimulate early activation of G proteins in cardiac fibroblasts. *Am J Physiol* 1998;274:C1424–C1428.
- [98] Akhter SA, Luttrell LM, Rockman HA, Iaccarino G, Lefkowitz RJ, Koch WJ. Targeting the receptor-Gq interface to inhibit in vivo pressure overload myocardial hypertrophy. *Science* 1998;280:574–577.
- [99] D'Angelo DD, Sakata Y, Lorenz JN et al. Transgenic  $G\alpha_q$  over-expression induces cardiac contractile failure in mice. *Proc Natl Acad Sci USA* 1997;94:8121–8126.
- [100] Jalili T, Takeishi Y, Walsh RA. Signal transduction during cardiac hypertrophy: the role of  $G\alpha_q$ , PLC  $\beta$ I, and PKC (review). *Cardiovasc Res* 1999;44:5–9.
- [101] Mende U, Kagen A, Cohen A, Araburu J, Schoen FJ, Neer EJ. Transient cardiac expression of constitutively active  $G\alpha_q$  leads to hypertrophy and dilated cardiomyopathy by calcineurin dependent and independent pathways. *Proc Natl Acad Sci USA* 1998;95:13893–13898.
- [102] Mende U, Kagen A, Meister M, Neer EJ. Signal transduction in atria and ventricles of mice with transient cardiac expression of activated G protein  $\alpha_q$ . *Circ Res* 1999;85:1085–1091.
- [103] Molkenstein JD, Lu J, Antos CL et al. A calcineurin-dependent transcriptional pathway for cardiac hypertrophy. *Cell* 1998;93:215–228.
- [104] Sturgill TW, Wu J. Recent progress in characterization of protein kinase cascades for phosphorylation of ribosomal protein S6 (minireview). *Biochim Biophys Acta* 1991;1092:350–357.
- [105] Dalby KN, Morrice N, Caudwell FB, Avruch J, Cohen P. Identification of regulatory phosphorylation sites in mitogen-activated protein kinase (MAPK)-activated protein kinase-1a/p90<sup>msk</sup> that are inducible by MAPK. *J Biol Chem* 1998;273:1496–1505.
- [106] Davis RJ. The mitogen-activated protein kinase signal transduction pathways (minireview). *J Biol Chem* 1993;268:14553–14556.
- [107] Cohen P. The search for physiological substrates of MAP and SAP kinases in mammalian cells (review). *Trends Cell Biol* 1997;7:353–361.
- [108] Sugden PH, Clerk A. Cellular mechanisms of cardiac hypertrophy. *Mol Med* 1998;76:725–746.
- [109] Clerk A, Sugden PH. Activation of protein kinase cascades in the heart by hypertrophic G protein-coupled receptor antagonists (review). *Am J Cardiol* 1999;83(suppl):64H–69H.

- [110] Robinson MJ, Cobb MH. Mitogen-activated protein kinase pathways (review). *Curr Opin Cell Biol* 1997;9:180–186.
- [111] Zheng C, Guan K. Activation of MEK family kinases requires phosphorylation of two conserved ser/thr residues. *EMBO J* 1994;13:1123–1131.
- [112] Cobb MH, Robbins DJ, Boulton TG. ERKs, extracellular signal-regulated MAP-2 kinases. *Curr Opin Cell Biol* 1991;3:1025–1032.
- [113] Force T, Pombo CM, Avruch JA, Bonventre JV, Kyriakis JM. Stress-activated protein kinases in cardiovascular disease (review). *Circ Res* 1996;78:947–953.
- [114] Sugden PH, Clerk A. ‘Stress-responsive’ mitogen-activated protein kinases (c-Jun N-terminal kinases and p38 mitogen-activated protein kinases) in the myocardium (minireview). *Circ Res* 1998;83:345–352.
- [115] Lange-Carter CA, Pleiman CM, Gardner AM, Blumer KJ, Johnson GL. A divergence in the MAP kinase regulatory network defined by MEK kinase and Raf. *Science* 1993;260:315–319.
- [116] Bogoyevitch MA, Glennon PE, Andersson MB et al. Endothelin-1 and fibroblast growth factor stimulate the mitogen-activated protein kinase signaling cascade in cardiac myocytes. The potential role of the cascade in the integration of two signaling pathways leading to myocyte hypertrophy. *J Biol Chem* 1994;269:1110–1119.
- [117] Boulton TG, Nye SH, Robbins DJ et al. ERKs: a family of protein-serine/threonine kinases that are activated and tyrosine phosphorylated in response to insulin and NGF. *Cell* 1991;65:663–675.
- [118] Howe LR, Leever SJ, Gomez N, Nakielnny S, Cohen P, Marshall CJ. Activation of the MAP kinase pathway by the protein kinase raf. *Cell* 1992;71:335–342.
- [119] Kyriakis JM, App H, Zhang X et al. Raf-1 activates MAP kinase-kinase. *Nature* 1992;358:417–421.
- [120] Morrison DK, Cutler REJ. The complexity of Raf-1 regulation. *Curr Opin Cell Biol* 1997;9:174–179.
- [121] Marais R, Light Y, Paterson HF, Marshall CJ. Ras recruits Raf-1 to the plasma membrane for activation by tyrosine phosphorylation. *EMBO J* 1995;14:3136–3145.
- [122] Tzivion G, Luo Z, Avruch J. A dimeric 14-3-3 protein is an essential cofactor for Raf kinase activity. *Nature* 1998;394:88–92.
- [123] Sadoshima J, Izumo S. The heterotrimeric G<sub>q</sub> protein-coupled angiotensin II receptor activates p21<sup>ras</sup> via the tyrosine kinase-Shc-Grb2-Sos pathway in cardiac myocytes. *EMBO J* 1996;15:775–787.
- [124] Stokoe D, McCormick F. Activation of c-Raf-1 by Ras and Src through different mechanisms: activation in vivo and in vitro. *EMBO J* 1997;16:2384–2396.
- [125] Zou Y, Komuro I, Yamazaki T et al. Protein kinase C, but not tyrosine kinases or Ras, plays a critical role in angiotensin II-induced activation of Raf-1 kinase and extracellular signal-regulated protein kinases in cardiac myocytes. *J Biol Chem* 1996;271:33592–33597.
- [126] Yamazaki T, Tobe K, Hoh E et al. Mechanical loading activates mitogen-activated protein kinase and S6 peptide kinase in cultured rat cardiac myocytes. *J Biol Chem* 1993;268:12069–12076.
- [127] Yamazaki T, Komuro I, Zou Y et al. Protein kinase A and protein kinase C synergistically activate the Raf-1 kinase/mitogen-activated protein kinase cascade in neonatal rat cardiomyocytes. *J Mol Cell Cardiol* 1997;29:2491–2501.
- [128] Yamazaki T, Komuro I, Yazaki Y. Role of the renin-angiotensin system in cardiac hypertrophy (review). *Am J Cardiol* 1999;83(suppl):53H–57H.
- [129] Sadoshima J, Qiu Z, Morgan JP, Izumo S. Angiotensin II and other hypertrophic stimuli mediated by G protein-coupled receptors activate tyrosine kinase, mitogen-activated protein kinase, and 90-kD S6 kinase in cardiac myocytes. *Circ Res* 1995;76:1–15.
- [130] Foncea R, Andersson M, Ketterman A et al. Insulin-like growth factor-I rapidly activates multiple signal transduction pathways in cultured rat cardiac myocytes. *J Biol Chem* 1997;272:19115–19124.
- [131] Hefti MA, Harder BA, Eppenberger HM, Schaub MC. Signaling pathways in cardiac myocyte hypertrophy (review). *J Mol Cell Cardiol* 1997;29:2873–2892.
- [132] Van Bilsen M. Signal transduction revisited: recent developments in Angiotensin II signaling in the cardiovascular system. *Cardiovasc Res* 1997;36:310–322.
- [133] Seko Y, Seko Y, Takahashi N, Tobe K, Kadowaki T, Yazaki Y. Pulsatile stretch activates mitogen-activated protein kinase (MAPK) family members and focal adhesion kinase (p125<sup>FAK</sup>) in cultured rat cardiac myocytes. *Biochem Biophys Res Commun* 1999;259:8–14.
- [134] Yazaki Y, Komuro I. Role of protein kinase system in the signal transduction of stretch-mediated myocyte growth. *Basic Res Cardiol* 1992;87(suppl 2):11–18.
- [135] Nyui N, Tamura K, Mizuno K et al. Stretch-induced Map kinase activation in cardiomyocytes of angiotensinogen-deficient mice. *Biochem Biophys Res Commun* 1997;235:36–41.
- [136] Yamazaki T, Komuro I, Kudoh S et al. Mechanical stress activates protein kinase cascade of phosphorylation in neonatal rat cardiac myocytes. *J Clin Invest* 1995;96:438–446.
- [137] Kashiwagi Y, Haneda T, Osaki J, Miyata S, Kikuchi K. Mechanical stretch activates a pathway linked to mevalonate metabolism in cultured neonatal rat heart cells. *Hypertens Res* 1995;21:109–119.
- [138] Kudoh S, Momuro I, Hiroi Y et al. Mechanical stretch induces hypertrophic responses in cardiac myocytes of angiotensin II type 1a receptor knockout mice. *J Biol Chem* 1998;273:24037–24043.
- [139] Post GR, Goldstein D, Thuerauf DJ, Glembocki CC, Brown JH. Dissociation of p44 and p42 mitogen-activated protein kinase activation from receptor-induced hypertrophy in neonatal rat ventricular myocytes. *J Biol Chem* 1996;271:8452–8457.
- [140] Thorburn J, Xu SC, Thorburn A. MAP kinase- and Rho-dependent signals interact to regulate gene expression but not actin morphology in cardiac muscle cells. *EMBO J* 1997;16:1888–1900.
- [141] Kyriakis JM, Banerjee P, Nikolakaki E et al. The stress-activated protein kinase subfamily of c-Jun kinases. *Nature* 1994;369:156–160.
- [142] Dérjard B, Hibi M, Wu I et al. JNK1: a protein kinase stimulated by UV light and Ha-Ras that binds and phosphorylates the c-Jun activation domain. *Cell* 1994;76:1025–1037.
- [143] Gupta S, Barrett T, Whitmarsh AJ et al. Selective interaction of JNK protein kinase isoforms with transcription factors. *EMBO J* 1996;15:2760–2770.
- [144] Tournier C, Whitmarsh AJ, Cavanagh J, Barrett T, Davis RJ. Mitogen-activated protein kinase kinase 7 is an activator of the c-Jun NH<sub>2</sub>-terminal kinase. *Proc Natl Acad Sci USA* 1997;94:7337–7342.
- [145] Yan M, Dai T, Deak JC et al. Activation of stress-activated protein kinase by phosphorylation of its activator SEK1. *Nature* 1994;372:798–800.
- [146] Wang XS, Diener K, Jannuzzi D et al. Molecular cloning and characterization of a novel protein kinase with a catalytic domain homologous to mitogen-activated protein kinase kinase kinase. *J Biol Chem* 1996;271:31607–31611.
- [147] Clerk A, Sugden PH. Cell stress-induced phosphorylation of ATF2 and c-jun transcription factors in rat ventricular myocytes. *Biochem J* 1997;325:801–810.
- [148] Komuro I, Kudo S, Yamazaki T, Zou Y, Shiojima I, Yazaki Y. Mechanical stretch activates the stress-activated protein kinases in cardiac myocytes. *FASEB J* 1996;10:631–636.
- [149] Nemoto S, Sheng Z, Lin A. Opposing effects of jun kinase and p38 mitogen-activated protein kinases on cardiomyocyte hypertrophy. *Mol Cell Biol* 1998;18:3518–3526.
- [150] New L, Han J. The p38 MAP kinase pathway and its biological function (review). *Trends Cardiovasc Med* 1998;8:220–228.
- [151] Zu Y, Ai Y, Gilchrist A et al. High expression and activation of MAP kinase-activated protein kinase 2 in cardiac muscle cells. *J Mol Cell Cardiol* 1997;29:2159–2168.

- [152] Stokoe D, Engel K, Campbell DG, Cohen P, Gaestel M. Identification of MAPKAP kinase 2 as a major enzyme responsible for the phosphorylation of the small mammalian heat shock proteins. *FEBS Lett* 1992;313:307–313.
- [153] Benjamin IJ, McMillan DR. Stress (heat shock) proteins: molecular chaperones in cardiovascular biology and disease (review). *Circ Res* 1998;83:117–132.
- [154] Zechner D, Thuerauf DJ, Hanford DS, McDonough PM, Glembotski CC. A role for the p38 mitogen-activated protein kinase pathway in myocardial cell growth, sarcomeric organization, and cardiac-specific gene expression. *J Cell Biol* 1997;139:115–127.
- [155] Ichijo H, Nishida E, Irie K et al. Induction of apoptosis by ASK1, a mammalian MAPKKK that activates SAPK/JNK and p38 signaling pathways. *Science* 1997;275:91–94.
- [156] Wang Y, Huang S, Sah VP et al. Cardiac muscle hypertrophy and apoptosis induced by distinct members of the p38 mitogen-activated protein kinase family. *J Biol Chem* 1998;273:2161–2168.
- [157] Camps M, Nichols A, Gillieron C et al. Catalytic activation of the phosphatase MKP-3 by ERK2 mitogen-activated protein kinase. *Science* 1998;280:1262–1265.
- [158] Chernoff J. Protein tyrosine phosphatases as negative regulators of mitogenic signaling (review). *J Cell Physiol* 1999;180:173–181.
- [159] Ihle JN. Cytokine receptor signalling. *Nature* 1995;377:591–594.
- [160] Schindler C, Darnell JEJ. Transcriptional responses to polypeptide ligands: The JAK-STAT pathway (review). *Annu Rev Biochem* 1995;64:621–651.
- [161] Horvath CM, Darnell JEJ. The state of the STATs: recent developments in the study of signal transduction to the nucleus (review). *Curr Opin Cell Biol* 1997;9:233–239.
- [162] Robledo O, Fourcin M, Chevalier S et al. Signaling of the cardiotrophin-1 receptor. *J Biol Chem* 1997;272:4855–4863.
- [163] Kishimoto T, Taga T, Akira S. Cytokine signal transduction (review). *Cell* 1994;76:253–262.
- [164] Takahashi T, Fukuda K, Pan J et al. Characterization of insulin-like growth factor-1-induced activation of the JAK/STAT pathway in rat cardiomyocytes. *Circ Res* 1999;85:884–891.
- [165] Mascareno E, Dhar M, Siddiqui MAQ. Signal transduction and activator of transcription (STAT) protein-dependent activation of angiotensinogen promoter: a cellular signal for hypertrophy in cardiac muscle. *Proc Natl Acad Sci USA* 1998;95:5590–5594.
- [166] McWhinney CD, Hunt RA, Conrad KM, Dostal DE, Baker KM. The type I angiotensin II receptor couples to Stat1 and Stat3 activation through Jak2 kinase in neonatal rat cardiac myocytes. *J Mol Cell Cardiol* 1997;29:2513–2524.
- [167] Bhat GJ, Thekkumkara TJ, Thomas WG, Conrad KM, Baker KM. Angiotensin II stimulates *sis*-inducing factor-like DNA binding activity. *J Biol Chem* 1994;269:31443–31449.
- [168] Pan J, Fukuda K, Kodama H et al. Role of angiotensin II in activation of the JAK/STAT pathway induced by acute pressure overload in the rat heart. *Circ Res* 1997;81:611–617.
- [169] Pan J, Fukuda K, Kodama H et al. Involvement of gp130-mediated signaling in pressure overload-induced activation of the JAK/STAT pathway in rodent heart. *Heart Vessels* 1998;13:199–208.
- [170] Pan J, Fukuda K, Saito M et al. Mechanical stretch activates the JAK/STAT pathway in rat cardiomyocytes. *Circ Res* 1999;84:1127–1136.
- [171] Kunisada K, Hirota H, Fujio Y et al. Activation of JAK-STAT and MAP kinases by leukemia inhibitory factor through gp 130 in cardiac myocytes. *Circulation* 1996;94:2626–2632.
- [172] Nyui N, Tamura K, Mizuno K et al. GP130 is involved in stretch-induced MAP kinase activation in cardiac myocytes. *Biochem Biophys Res Commun* 1998;245:928–932.
- [173] Adachi M, Fischer EH, Ihle J et al. Mammalian SH2-containing protein tyrosine phosphatases (Letter to editor). *Cell* 1996;85:15.
- [174] Jiao H, Berrada K, Yang W, Tabrizi M, Platanias LC, Yi T. Direct association with and dephosphorylation of Jak2 kinase by the SH2-domain-containing protein tyrosine phosphatase SHP-1. *Mol Cell Biol* 1996;16:6985–6992.
- [175] Marrero MB, Venema VJ, Ju H, Eaton DC, Venema RC. Regulation of angiotensin II-induced JAK2 tyrosine phosphorylation: roles of SHP-1 and SHP-2. *Am J Physiol* 1998;275:C1216–C1223.
- [176] Tang TL, Freeman RMJ, O'Reilly AM, Neel BG, Sokol S. The SH2-containing protein-tyrosine phosphatase SH-PTP2 is required upstream of MAP kinase for early *Xenopus* development. *Cell* 1995;80:473–483.
- [177] Sussman MA, Lim HW, Gude N et al. Prevention of cardiac hypertrophy in mice by calcineurin inhibition. *Science* 1998;281:1690–1693.
- [178] Shimoyama M, Hayashi D, Takimoto E et al. Calcineurin plays a critical role in pressure overload-induced cardiac hypertrophy. *Circulation* 1999;100:2449–2454.
- [179] Ding B, Price RL, Borg TK, Weinberg EO, Halloran PF, Lorell BH. Pressure overload induces severe hypertrophy in mice treated with cyclosporine, an inhibitor of calcineurin. *Circ Res* 1999;84:729–734.
- [180] Zhang W, Kowai RC, Rusnak F, Sikkink RA, Olson EN, Victor RG. Failure of calcineurin inhibitors to prevent pressure-overload left ventricular hypertrophy in rats. *Circ Res* 1999;84:722–728.
- [181] Pain VM. Initiation of protein synthesis in eukaryotic cells (review). *Eur J Biochem* 1996;236:747–771.
- [182] Lawrence Jr JC, Abraham RT. PHAS/4E-BPs as regulators of mRNA translation and cell proliferation. *Trends Biochem Sci* 1997;22:345–349.
- [183] Haystead TAJ, Haystead CMM, Hu C, Lin T, Lawrence JCJ. Phosphorylation of PHAS-I by mitogen-activated protein (MAP) kinase. Identification of a site phosphorylated by MAP kinase in vitro and in response to insulin in rat adipocytes. *J Biol Chem* 1994;269:23185–23191.
- [184] Stewart MJ, Thomas G. Mitogenesis and protein synthesis: a role for ribosomal protein S6 phosphorylation (review). *BioEssays* 1994;16:809–815.
- [185] Sturgill TW, Ray LB, Erikson E, Maller JL. Insulin-stimulated MAP-2 kinase phosphorylates and activates ribosomal protein S6 kinase II. *Nature* 1988;334:715–719.
- [186] Chung J, Kuo CJ, Crabtree GR, Blenis J. Rapamycin-FKBP specifically blocks growth-dependent activation of and signaling by the 70 kD S6 protein kinases. *Cell* 1992;69:1227–1236.
- [187] Dostal DE, Rothblum KN, Chernin MI, Cooper GR, Baker KM. Intracardiac detection of angiotensinogen and renin: a localized renin–angiotensin system in neonatal rat heart. *Am J Physiol* 1992;263:C838–C850.
- [188] Danser AHJ, Saris JJ, Schuijt MP, van Katz JP. Is there a local renin–angiotensin system in the heart? (review). *Cardiovasc Res* 1999;44:252–265.
- [189] Cook JL, Bhandaru S, Giardian JF, Calycomb WC, Ré RN. Identification and antisense inhibition of a renin–angiotensin system in transgenic cardiomyocytes. *Am J Physiol* 1995;268:H1471–H1482.
- [190] Sadoshima J, Izumo S. Molecular characterization of angiotensin II-induced hypertrophy of cardiac myocytes and hyperplasia of cardiac fibroblasts. Critical role of the AT<sub>1</sub> receptor subtype. *Circ Res* 1993;73:413–423.
- [191] Shyu KG, Chen JJ, Shih NL et al. Angiotensinogen gene expression is induced by cyclical mechanical stretch in cultured rat cardiomyocytes. *Biochem Biophys Res Commun* 1995;211:241–248.
- [192] Kojima M, Shiojima I, Yamazaki T et al. Angiotensin II receptor antagonist TCV-116 induces regression of hypertensive left ventricular hypertrophy in vivo and inhibits the intracellular signaling pathway of stretch-mediated cardiomyocyte hypertrophy in vitro. *Circulation* 1994;89:2204–2221.
- [193] Yamazaki T, Komuro I, Kudoh S et al. Angiotensin II partly mediates mechanical stress-induced cardiac hypertrophy. *Circ Res* 1995;77:258–265.
- [194] Harada K, Komuro I, Zou Y et al. Acute pressure overload could

- induce hypertrophic responses in the heart of angiotensin II type 1a knockout mice. *Circ Res* 1998;82:779–785.
- [195] Harada K, Komuro I, Shiojima I et al. Pressure overload induces cardiac hypertrophy in angiotensin II type 1A receptor knockout mice. *Circulation* 1998;97:1952–1959.
- [196] Yanagisawa M, Kurihara H, Kimura S et al. A novel potent vasoconstrictor peptide produced by vascular endothelial cells. *Nature* 1988;332:411–415.
- [197] Shubeita HE, McDonough PM, Harris AN et al. Endothelin induction of inositol phospholipid hydrolysis, sarcomere assembly, and cardiac gene expression in ventricular myocytes. A paracrine mechanism for myocardial cell hypertrophy. *J Biol Chem* 1990;265:20555–20562.
- [198] Suzuki T, Hoshi H, Mitsui Y. Endothelin stimulates hypertrophy and contractility of neonatal rat cardiac myocytes in a serum-free medium. *FEBS Lett* 1990;268:149–151.
- [199] Ito H, Hirata Y, Hiroe M et al. Endothelin-1 induces hypertrophy with enhanced expression of muscle-specific genes in cultured neonatal rat cardiomyocytes. *Circ Res* 1991;69:209–215.
- [200] Ito H, Hiroe M, Hirata Y et al. Endothelin ET<sub>A</sub> receptor antagonist blocks cardiac hypertrophy provoked by hemodynamic overload. *Circulation* 1994;89:2198–2203.
- [201] Assoian RK, Komoriya A, Meyers CA, Miller DM, Sporn MB. Transforming growth factor- $\beta$  in human platelets. Identification of a major storage site, purification, and characterization. *J Biol Chem* 1983;258:7155–7160.
- [202] Long CS. Autocrine and paracrine regulation of myocardial cell growth in vitro. The TGF- $\beta$  paradigm (review). *Trends Cardiovasc Med* 1996;6:217–226.
- [203] Massagué J, Cheifetz S, Laiho M, Ralph DA, Weis FMB, Zentella A. Transforming growth factor- $\beta$ . *Cancer Surv* 1992;12:81–103.
- [204] Lyons RM, Keski-Oja J, Moses HL. Proteolytic activation of latent transforming growth factor- $\beta$  from fibroblast-conditioned medium. *J Cell Biol* 1988;106:1659–1665.
- [205] Parker TG, Packer SE, Schneider MD. Peptide growth factors can provoke ‘fetal’ contractile protein gene expression in rat cardiac myocytes. *J Clin Invest* 1990;85:507–514.
- [206] Komuro I, Katoh Y, Hoh E, Takaku F, Yazaki Y. Mechanisms of cardiac hypertrophy and injury. Possible role of protein kinase C activation. *Jpn Circ J* 1991;55:1149–1157.
- [207] Takahashi N, Calderone A, Izzo NJ, Mäki TM, Marsh JD, Colucci WS. Hypertrophic stimuli induce transforming growth factor- $\beta_1$  expression in rat ventricular myocytes. *J Clin Invest* 1994;94:1470–1476.
- [208] Villarreal FJ, Kim NN. Regulation of myocardial extracellular matrix components by mechanical and chemical growth factors. *Cardiovasc Pathol* 1998;7:145–151.
